# Supplementary material for: Reference measurement procedures for the iron saturation in human transferrin based on IDMS and Raman scattering
Source: Royal Society of Chemistry journal article supplement (doi:10.1039/c2mt20183f), 2012-01-01
Supplement: c2mt20183f.pdf [file c2mt20183f.pdf]

## Supporting information available.

Tf saturation  $S_{ms} = b$

$$b = \frac{n(\text{Fe})}{2 \cdot n(\text{T})} = \frac{N}{N_{\text{max}}} = \frac{n(\text{Fe})}{n_{\text{max}}(\text{Fe})}$$

$$R_x = \frac{n_{x,57}}{n_{x,56}}$$

$$R_y = \frac{n_{y,57}}{n_{y,56}}$$

$$R_{\text{bx}} = \frac{n_{\text{bx},57}}{n_{\text{bx},56}} = \frac{n_{x,57} + n_{y,57}}{n_{x,56} + n_{y,56}}$$

$$b = \frac{n(\text{Fe})}{n_{\text{max}}(\text{Fe})} = \frac{n_x(\text{Fe})}{n_x(\text{Fe}) + n_y(\text{Fe})}$$

$$\begin{aligned} b_y &= \frac{n_y(\text{Fe})}{n_x(\text{Fe}) + n_y(\text{Fe})} \\ &= \frac{n_x(\text{Fe}) + n_y(\text{Fe})}{n_x(\text{Fe}) + n_y(\text{Fe})} - \frac{n_x(\text{Fe})}{n_x(\text{Fe}) + n_y(\text{Fe})} \\ &= 1 - b \end{aligned}$$

$$R_{\text{bx}} = \frac{n_{x,57} + n_{y,57}}{n_{x,56} + n_{y,56}} = \frac{x_{x,57} \cdot n_x(\text{Fe}) + x_{y,57} \cdot n_y(\text{Fe})}{x_{x,56} \cdot n_x(\text{Fe}) + x_{y,56} \cdot n_y(\text{Fe})} \cdot \frac{n_x(\text{Fe}) + n_y(\text{Fe})}{n_x(\text{Fe}) + n_y(\text{Fe})}$$

$$R_{\text{bx}} = \frac{x_{x,57} \cdot \frac{n_x(\text{Fe})}{n_x(\text{Fe}) + n_y(\text{Fe})} + x_{y,57} \cdot \frac{n_y(\text{Fe})}{n_x(\text{Fe}) + n_y(\text{Fe})}}{x_{x,56} \cdot \frac{n_x(\text{Fe})}{n_x(\text{Fe}) + n_y(\text{Fe})} + x_{y,56} \cdot \frac{n_y(\text{Fe})}{n_x(\text{Fe}) + n_y(\text{Fe})}}$$

$$R_{\text{bx}} = \frac{x_{x,57} \cdot b + x_{y,57} \cdot (1 - b)}{x_{x,56} \cdot b + x_{y,56} \cdot (1 - b)}$$

$$R_{\text{bx}} \cdot [x_{x,56} \cdot b + x_{y,56} \cdot (1 - b)] = x_{x,57} \cdot b + x_{y,57} \cdot (1 - b)$$

$$R_{\text{bx}} \cdot x_{x,56} \cdot b + R_{\text{bx}} \cdot x_{y,56} \cdot (1 - b) = x_{x,57} \cdot b + x_{y,57} \cdot (1 - b)$$

$$R_{\text{bx}} \cdot x_{x,56} \cdot b + R_{\text{bx}} \cdot x_{y,56} - R_{\text{bx}} \cdot x_{y,56} \cdot b = x_{x,57} \cdot b + x_{y,57} - x_{y,57} \cdot b$$

$$b \cdot (R_{\text{bx}} \cdot x_{x,56} - R_{\text{bx}} \cdot x_{y,56} - x_{x,57} + x_{y,57}) = x_{y,57} - R_{\text{bx}} \cdot x_{y,56}$$

$$b = \frac{x_{y,57} - R_{\text{bx}} \cdot x_{y,56}}{R_{\text{bx}} \cdot x_{x,56} - R_{\text{bx}} \cdot x_{y,56} - x_{x,57} + x_{y,57}}$$

$$b = \frac{x_{y,57} - R_{bx} \cdot x_{y,56}}{R_{bx} \cdot x_{x,56} - R_{bx} \cdot x_{y,56} - x_{x,57} + x_{y,57}}$$

$$b = \frac{x_{y,57} - R_{bx} \cdot x_{y,56}}{R_{bx} \cdot x_{x,56} - x_{x,57} + x_{y,57} - R_{bx} \cdot x_{y,56}}$$

$$b = \frac{\frac{R_{y,57}}{\sum_i R_{y,i}} - R_{bx} \cdot \frac{R_{y,56}}{\sum_i R_{y,i}}}{R_{bx} \cdot \frac{R_{x,56}}{\sum_i R_{x,i}} - \frac{R_{x,57}}{\sum_i R_{x,i}} + \frac{R_{y,57}}{\sum_i R_{y,i}} - R_{bx} \cdot \frac{R_{y,56}}{\sum_i R_{y,i}}}$$

$$b = \frac{\frac{R_{y,57}}{\sum_i R_{y,i}} - R_{bx} \cdot \frac{1}{\sum_i R_{y,i}}}{R_{bx} \cdot \frac{1}{\sum_i R_{x,i}} - \frac{R_{x,57}}{\sum_i R_{x,i}} + \frac{R_{y,57}}{\sum_i R_{y,i}} - R_{bx} \cdot \frac{1}{\sum_i R_{y,i}}}$$

$$\frac{1}{b} = \frac{R_{bx} \cdot \frac{1}{\sum_i R_{x,i}} - \frac{R_{x,57}}{\sum_i R_{x,i}} + \frac{R_{y,57}}{\sum_i R_{y,i}} - R_{bx} \cdot \frac{1}{\sum_i R_{y,i}}}{\frac{R_{y,57}}{\sum_i R_{y,i}} - R_{bx} \cdot \frac{1}{\sum_i R_{y,i}}}$$

$$\frac{1}{b} = \frac{R_{bx} \cdot \frac{1}{\sum_i R_{x,i}} - \frac{R_{x,57}}{\sum_i R_{x,i}}}{\frac{R_{y,57}}{\sum_i R_{y,i}} - R_{bx} \cdot \frac{1}{\sum_i R_{y,i}}} + 1$$

$$\frac{1}{b} = 1 + \frac{(R_{bx} - R_{x,57}) \cdot \frac{1}{\sum_i R_{x,i}}}{(R_{y,57} - R_{bx}) \cdot \frac{1}{\sum_i R_{y,i}}}$$

$$\frac{1}{b} = 1 + \frac{(R_{bx} - R_{x,57}) \cdot \sum_i R_{y,i}}{(R_{y,57} - R_{bx}) \cdot \sum_i R_{x,i}}$$

$$b = \frac{1}{1 + \frac{(R_{bx} - R_{x,57}) \cdot \sum_i R_{y,i}}{(R_{y,57} - R_{bx}) \cdot \sum_i R_{x,i}}}$$

$$b = \frac{1}{1 + \frac{R_{bx} - R_x}{R_y - R_{bx}} \cdot \frac{\sum_i R_{y,i}}{\sum_i R_{x,i}}}$$
